# Supplementary material for: Tolmetin Sodium Fast Dissolving Tablets for Rheumatoid Arthritis Treatment: Preparation and Optimization Using Box-Behnken Design and Response Surface Methodology
Source: MDPI journal article supplement (doi:10.3390/pharmaceutics14040880), 2022-04-18
Supplement: s1 [file s1]

Supplementary data

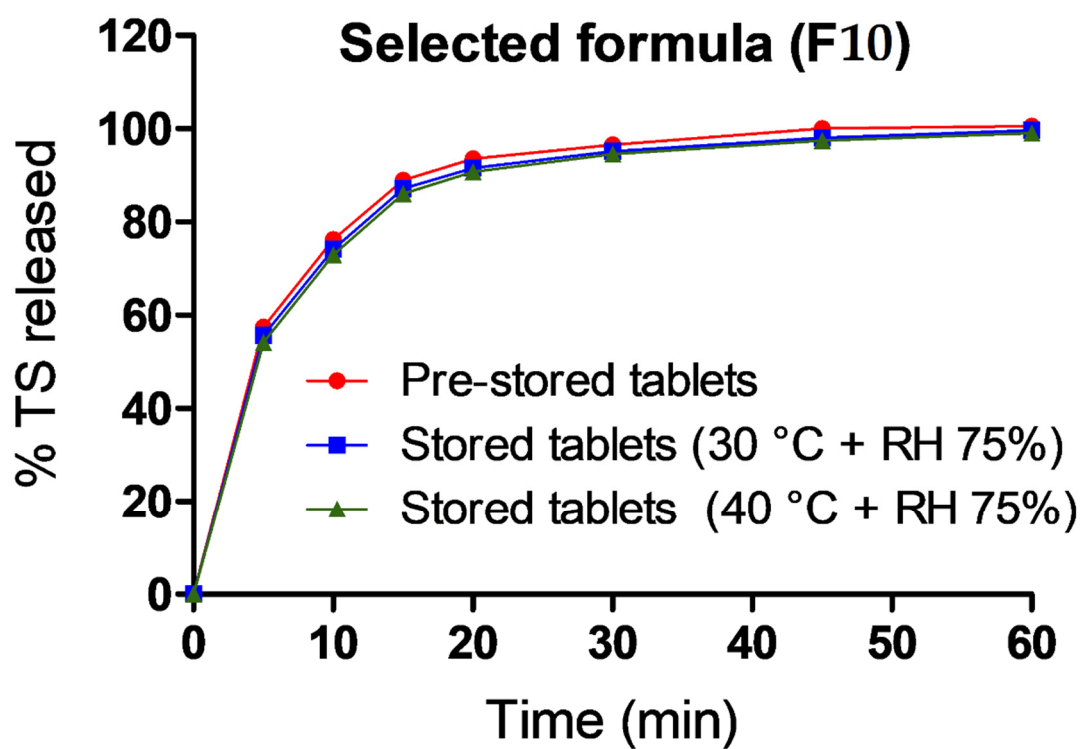

**Figure S1.** Release profiles of TLM from TLM-FDTs (F11) after storage at 30 and 40 °C + RH 75% for three months compared with the corresponding recently prepared tablets.

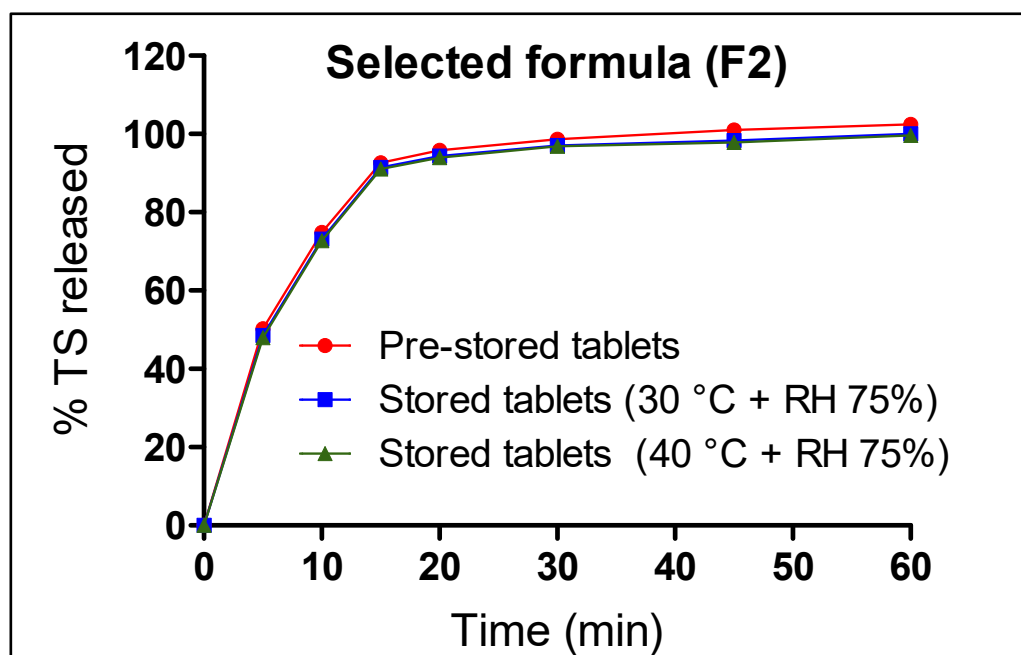

**Figures S2.** Release profiles of TLM from TLM-FDTs (F2) after storage at 30 and 40 °C +RH 75% for three months compared with the corresponding recently prepared tablets.
